# Supplementary material for: Associations between Adverse Childhood Experiences (ACEs) and Lifetime Experience of Car Crashes and Burns: A Cross-Sectional Study
Source: MDPI journal article supplement (doi:10.3390/ijerph192316036), 2022-11-30
Supplement: s1 [file s1]

**Supplementary Materials S1: Questions and qualifying responses for adverse childhood experiences (ACEs) and injury types**

|                            | <b>Question (<i>response options</i>)</b>                                                                                                                                                                             | <b>Qualifying response</b> |
|----------------------------|-----------------------------------------------------------------------------------------------------------------------------------------------------------------------------------------------------------------------|----------------------------|
| <b>ACEs</b>                | All ACE questions were preceded by the statement “While you were growing up, before the age of 18...”                                                                                                                 |                            |
| <i>Physical abuse</i>      | How often did a parent or adult in your home ever hit, beat, kick, or physically hurt you in any way? This does not include gentle smacking for punishment. ( <i>never; once; more than once; prefer not to say</i> ) | Once or more than once     |
| <i>Verbal abuse</i>        | How often did a parent or adult in your home ever swear at you, insult you, or put you down? ( <i>never; once; more than once; prefer not to say</i> )                                                                | More than once             |
| <i>Sexual abuse</i>        | Did an adult or someone at least five years older than you sexually abuse you by touching you or making you undertake any sexual activity with them? ( <i>yes; no; prefer not to say</i> )                            | Yes                        |
| <i>Parental separation</i> | Were your parents ever separated or divorced? ( <i>yes; no; prefer not to say</i> )                                                                                                                                   | Yes                        |
| <i>Domestic violence</i>   | How often did your parents or adults in your home ever slap, hit, kick, punch, or beat each other up? ( <i>never; once; more than once; prefer not to say</i> )                                                       | Once or more than once     |
| <i>Mental illness</i>      | Did you live with anyone who was depressed, mentally ill or suicidal? ( <i>yes; no; prefer not to say</i> )                                                                                                           | Yes                        |
| <i>Alcohol abuse</i>       | Did you live with anyone who was a problem drinker or alcoholic? ( <i>yes; no; prefer not to say</i> )                                                                                                                | Yes                        |
| <i>Drug abuse</i>          | Did you live with anyone who used illegal street drugs or abused prescription medications? ( <i>yes; no; prefer not to say</i> )                                                                                      | Yes                        |
| <i>Incarceration</i>       | Did you live with anyone who served time or was sentenced to serve time in a prison or young offenders' institution? ( <i>yes; no; prefer not to say</i> )                                                            | Yes                        |
| <b>Injuries</b>            | All injury questions were preceded by the question, “About how many times in your life have you experienced the following...”                                                                                         |                            |
| <i>Broken bone</i>         | A broken bone? ( <i>never; once; 2-5 times; 6-10 times; more than 10 times; prefer not to say</i> )                                                                                                                   | Never, once or 2+ times    |
| <i>Car crash</i>           | Been in a car crash, regardless of whose fault it was? ( <i>never; once; 2-5 times; 6-10 times; more than 10 times; prefer not to say</i> )                                                                           | Never, once or 2+ times    |
| <i>Burns</i>               | Had a burn severe enough to require professional medical attention? ( <i>never; once; 2-5 times; 6-10 times; more than 10 times; prefer not to say</i> )                                                              | Never, once or 2+ times    |
| <i>Requires stitches</i>   | Required stitches for a cut? ( <i>never; once; 2-5 times; 6-10 times; more than 10 times; prefer not to say</i> )                                                                                                     | Never, once or 2+ times    |
