# Supplementary material for: Associations between Adverse Childhood Experiences (ACEs) and Lifetime Experience of Car Crashes and Burns: A Cross-Sectional Study
Source: MDPI journal article supplement (doi:10.3390/ijerph192316036), 2022-11-30
Supplement: s1 [file s1]

# Supplementary file S2

**Table S1.** Bivariate relationships between injury outcomes and participant demographics

|                      |                |      | % Car crash |      |       |         | % Burn <sup>#</sup> |      |       |        |       |
|----------------------|----------------|------|-------------|------|-------|---------|---------------------|------|-------|--------|-------|
|                      |                |      |             |      |       | 2+      |                     |      |       | 2+     |       |
|                      |                |      | n           | Ever | Never | Once    | times               | Ever | Never | Once   | times |
| All                  |                | 4783 | 52.6        | 47.4 | 24.4  | 28.2    | 11.6                | 88.4 | 9.6   | 2.1    |       |
| ACE count            | 0              | 2412 | 48.5        | 51.5 | 23.4  | 25.2    | 9.0                 | 91.0 | 7.9   | 1.1    |       |
|                      | 1              | 1056 | 52.9        | 47.1 | 24.3  | 28.6    | 11.3                | 88.7 | 9.2   | 2.1    |       |
|                      | 2-3            | 813  | 58.3        | 41.7 | 26.9  | 31.4    | 14.5                | 85.5 | 11.7  | 2.8    |       |
|                      | 4+             | 502  | 62.5        | 37.5 | 25.5  | 37.1    | 20.3                | 79.7 | 14.9  | 5.4    |       |
|                      | X <sup>2</sup> |      | 46.462      |      |       | 52.62   | 59.888              |      |       | 72.658 |       |
|                      | p              |      | <0.001      |      |       | <0.001  | <0.001              |      |       | <0.001 |       |
| Gender               | Male           | 1809 | 63.0        | 37.0 | 23.9  | 39.1    | 13.2                | 86.8 | 10.4  | 2.8    |       |
|                      | Female         | 2974 | 46.3        | 53.7 | 24.7  | 21.6    | 10.7                | 89.3 | 9.0   | 1.6    |       |
|                      | X <sup>2</sup> |      | 125.580     |      |       | 189.21  | 7.135               |      |       | 10.03  |       |
|                      | p              |      | <0.001      |      |       | <0.001  | 0.008               |      |       | 0.007  |       |
| Age group            | 18-29          | 448  | 39.5        | 60.5 | 25.4  | 14.1    | 16.3                | 83.7 | 11.8  | 4.5    |       |
|                      | 30-39          | 521  | 52.4        | 47.6 | 26.7  | 25.7    | 13.1                | 86.9 | 10.2  | 2.9    |       |
|                      | 40-49          | 787  | 63.0        | 37.0 | 23.9  | 39.1    | 12.5                | 87.5 | 10.2  | 2.3    |       |
|                      | 50-59          | 1037 | 58.4        | 41.6 | 23.9  | 34.5    | 12.1                | 87.9 | 9.9   | 2.1    |       |
|                      | 60-69          | 898  | 55.0        | 45.0 | 24.9  | 30.1    | 11.7                | 88.3 | 10.2  | 1.4    |       |
|                      | 70+            | 1092 | 43.2        | 56.8 | 23.4  | 19.9    | 8.0                 | 92.0 | 7.0   | 1.0    |       |
|                      | X <sup>2</sup> |      | 119.886     |      |       | 174.043 | 25.479              |      |       | 36.091 |       |
|                      | p              |      | <0.001      |      |       | <0.001  | <0.001              |      |       | <0.001 |       |
| Ethnicity            | White          | 4483 | 52.9        | 47.1 | 24.4  | 28.5    | 11.6                | 88.4 | 9.6   | 2.0    |       |
|                      | Other          | 300  | 49.3        | 50.7 | 24.7  | 24.7    | 12.3                | 87.7 | 9.3   | 3.0    |       |
|                      | X <sup>2</sup> |      | 1.408       |      |       | 2.185   | 0.157               |      |       | 1.373  |       |
|                      | p              |      | 0.235       |      |       | 0.335   | 0.692               |      |       | 0.503  |       |
| Deprivation quintile | 1 - most       | 1204 | 47.8        | 52.2 | 23.5  | 24.3    | 15.6                | 84.4 | 11.9  | 3.7    |       |
|                      | 2              | 865  | 51.4        | 48.6 | 24.2  | 27.3    | 10.3                | 89.7 | 9.0   | 1.3    |       |
|                      | 3              | 847  | 51.4        | 48.6 | 23.1  | 28.2    | 13.0                | 87.0 | 10.5  | 2.5    |       |
|                      | 4              | 926  | 56.0        | 44.0 | 26.5  | 29.6    | 9.4                 | 90.6 | 8.2   | 1.2    |       |
|                      | 5 - least      | 941  | 57.8        | 42.2 | 25.0  | 32.8    | 8.7                 | 91.3 | 7.5   | 1.2    |       |
|                      | X <sup>2</sup> |      | 26.972      |      |       | 31.604  | 33.929              |      |       | 44.239 |       |
|                      | p              |      | <0.001      |      |       | <0.001  | <0.001              |      |       | <0.001 |       |
| Survey method        | Telephone      | 3944 | 52.8        | 47.2 | 23.7  | 29.0    | 10.8                | 89.2 | 9.1   | 1.7    |       |
|                      | Online         | 839  | 52.1        | 47.9 | 27.7  | 24.4    | 15.4                | 84.6 | 11.7  | 3.7    |       |
|                      | X <sup>2</sup> |      | 0.128       |      |       | 9.601   | 13.935              |      |       | 19.414 |       |
|                      | p              |      | 0.721       |      |       | 0.008   | <0.001              |      |       | <0.001 |       |
| Study area           | Bolton         | 1865 | 53.3        | 46.7 | 22.7  | 30.6    | 12.2                | 87.8 | 9.9   | 2.3    |       |
|                      | Wales          | 2918 | 52.2        | 47.8 | 25.5  | 26.7    | 11.3                | 88.7 | 9.4   | 1.9    |       |
|                      | X <sup>2</sup> |      | 0.523       |      |       | 9.751   | 0.891               |      |       | 1.235  |       |
|                      | p              |      | 0.470       |      |       | 0.008   | 0.345               |      |       | 0.539  |       |

ACE = adverse childhood experience.

**Table S2.** Logistic regression analysis of relationships between ACEs, socio-demographics, study area and survey type and having ever experienced injury types

|                      |           | Car crash |      |      |        | Burn <sup>#</sup> |      |      |        |
|----------------------|-----------|-----------|------|------|--------|-------------------|------|------|--------|
|                      |           | Low       |      | High |        | Low               |      | High |        |
|                      |           | AOR       | CI   | CI   | P      | AOR               | CI   | CI   | P      |
| ACE count            | 0         | Ref.      |      |      | <0.001 | Ref.              |      |      | <0.001 |
|                      | 1         | 1.22      | 1.05 | 1.41 | 0.011  | 1.22              | 0.96 | 1.55 | 0.101  |
|                      | 2-3       | 1.49      | 1.26 | 1.77 | <0.001 | 1.54              | 1.21 | 1.97 | 0.001  |
|                      | 4+        | 1.88      | 1.53 | 2.32 | <0.001 | 2.24              | 1.71 | 2.93 | <0.001 |
| Gender               | Male      | 2.13      | 1.88 | 2.41 | <0.001 | 1.35              | 1.13 | 1.63 | 0.001  |
| Age group            | 18-29     | Ref.      |      |      | <0.001 | Ref.              |      |      | 0.059  |
|                      | 30-39     | 1.85      | 1.42 | 2.40 | <0.001 | 0.84              | 0.58 | 1.20 | 0.334  |
|                      | 40-49     | 2.79      | 2.17 | 3.57 | <0.001 | 0.84              | 0.60 | 1.19 | 0.327  |
|                      | 50-59     | 2.19      | 1.72 | 2.78 | <0.001 | 0.86              | 0.62 | 1.19 | 0.361  |
|                      | 60-69     | 1.86      | 1.46 | 2.38 | <0.001 | 0.85              | 0.61 | 1.20 | 0.367  |
|                      | 70+       | 1.15      | 0.91 | 1.47 | 0.245  | 0.59              | 0.41 | 0.84 | 0.003  |
| Ethnicity            | White     | 1.17      | 0.90 | 1.51 | 0.240  | 1.27              | 0.87 | 1.85 | 0.225  |
| Deprivation quintile | 1 - most  | 0.62      | 0.52 | 0.75 | <0.001 | 1.79              | 1.34 | 2.38 | <0.001 |
|                      | 2         | 0.75      | 0.62 | 0.91 | 0.003  | 1.14              | 0.83 | 1.57 | 0.422  |
|                      | 3         | 0.77      | 0.64 | 0.94 | 0.009  | 1.54              | 1.13 | 2.09 | 0.006  |
|                      | 4         | 0.94      | 0.78 | 1.14 | 0.530  | 1.08              | 0.79 | 1.48 | 0.639  |
|                      | 5 - least | Ref.      |      |      | <0.001 | Ref.              |      |      | <0.001 |
| Survey method        | Online    | 0.99      | 0.84 | 1.16 | 0.899  | 1.34              | 1.07 | 1.68 | 0.011  |
| Study area           | Wales     | 0.88      | 0.77 | 1.00 | 0.045  | 0.93              | 0.77 | 1.13 | 0.469  |

AOR = adjusted odds ratio; CI = confidence interval (95%); Ref = reference category. Reference categories for gender, ethnicity, survey method and study area were female, other, telephone and Bolton Local Authority respectively. <sup>#</sup>Severe enough to require professional medical attention. Full wording of all questions is provided in Supplementary file S1.

**Table S3.** Multinomial logistic regression analysis of ACEs, socio-demographics, survey method and associations with car crashes and burns

|                      |           | Car crash |      |      |      |        |          |      |      |        |           | Burn <sup>#</sup> |      |      |        |      |          |      |        |  |  |
|----------------------|-----------|-----------|------|------|------|--------|----------|------|------|--------|-----------|-------------------|------|------|--------|------|----------|------|--------|--|--|
|                      |           | Once      |      |      |      |        | 2+ times |      |      |        |           | Once              |      |      |        |      | 2+ times |      |        |  |  |
|                      |           | Reference | Low  | High |      |        | Low      | High |      |        | Reference | Low               | High |      |        | Low  | High     |      |        |  |  |
|                      |           | category* | AOR  | CI   | CI   | P      | AOR      | CI   | CI   | P      | category* | AOR               | CI   | CI   | P      | AOR  | CI       | CI   | P      |  |  |
| ACE count            | 0         | <0.001    | Ref. |      |      |        | Ref.     |      |      |        | <0.001    | Ref.              |      |      |        | Ref. |          |      |        |  |  |
|                      | 1         |           | 1.15 | 0.96 | 1.38 | 0.130  | 1.28     | 1.07 | 1.54 | 0.007  |           | 1.15              | 0.89 | 1.49 | 0.292  | 1.74 | 0.98     | 3.08 | 0.060  |  |  |
|                      | 2-3       |           | 1.43 | 1.17 | 1.75 | 0.001  | 1.54     | 1.26 | 1.89 | <0.001 |           | 1.45              | 1.11 | 1.89 | 0.006  | 2.17 | 1.22     | 3.85 | 0.008  |  |  |
|                      | 4+        |           | 1.53 | 1.18 | 1.97 | 0.001  | 2.30     | 1.80 | 2.93 | <0.001 |           | 1.95              | 1.45 | 2.62 | <0.001 | 4.13 | 2.34     | 7.29 | <0.001 |  |  |
| Gender               | Male      | <0.001    | 1.47 | 1.26 | 1.71 | <0.001 | 3.01     | 2.59 | 3.49 | <0.001 | 0.001     | 1.25              | 1.03 | 1.53 | 0.028  | 1.98 | 1.32     | 2.98 | 0.001  |  |  |
| Age                  | 18-29     | <0.001    | Ref. |      |      |        | Ref.     |      |      |        | 0.140     | Ref.              |      |      |        | Ref. |          |      |        |  |  |
|                      | 30-39     |           | 1.43 | 1.05 | 1.94 | 0.022  | 2.66     | 1.86 | 3.80 | <0.001 |           | 0.88              | 0.58 | 1.32 | 0.531  | 0.73 | 0.36     | 1.48 | 0.386  |  |  |
|                      | 40-49     |           | 1.68 | 1.26 | 2.26 | <0.001 | 4.95     | 3.55 | 6.90 | <0.001 |           | 0.92              | 0.63 | 1.34 | 0.650  | 0.65 | 0.33     | 1.27 | 0.203  |  |  |
|                      | 50-59     |           | 1.45 | 1.10 | 1.92 | 0.009  | 3.62     | 2.62 | 4.99 | <0.001 |           | 0.93              | 0.64 | 1.34 | 0.690  | 0.67 | 0.35     | 1.29 | 0.226  |  |  |
|                      | 60-69     |           | 1.40 | 1.05 | 1.86 | 0.021  | 2.76     | 1.98 | 3.85 | <0.001 |           | 0.98              | 0.67 | 1.42 | 0.899  | 0.48 | 0.23     | 1.02 | 0.057  |  |  |
|                      | 70+       |           | 1.05 | 0.79 | 1.39 | 0.746  | 1.40     | 1.00 | 1.96 | 0.049  |           | 0.66              | 0.45 | 0.98 | 0.041  | 0.35 | 0.16     | 0.79 | 0.011  |  |  |
| Ethnicity            | White     | 0.227     | 1.05 | 0.77 | 1.42 | 0.781  | 1.31     | 0.95 | 1.80 | 0.095  | 0.447     | 1.28              | 0.83 | 1.95 | 0.264  | 1.27 | 0.60     | 2.70 | 0.532  |  |  |
| Deprivation quintile | 1 - most  |           | 0.73 | 0.59 | 0.92 | 0.007  | 0.53     | 0.42 | 0.66 | <0.001 |           | 1.61              | 1.18 | 2.20 | 0.002  | 2.81 | 1.41     | 5.61 | 0.003  |  |  |
|                      | 2         |           | 0.82 | 0.65 | 1.04 | 0.094  | 0.69     | 0.55 | 0.86 | 0.001  |           | 1.17              | 0.83 | 1.64 | 0.364  | 0.97 | 0.42     | 2.27 | 0.948  |  |  |
|                      | 3         |           | 0.79 | 0.63 | 1.01 | 0.056  | 0.75     | 0.60 | 0.95 | 0.016  |           | 1.44              | 1.04 | 2.01 | 0.029  | 2.12 | 1.01     | 4.45 | 0.048  |  |  |
|                      | 4         |           | 1.03 | 0.82 | 1.29 | 0.828  | 0.87     | 0.69 | 1.09 | 0.211  |           | 1.09              | 0.78 | 1.53 | 0.620  | 1.01 | 0.43     | 2.35 | 0.982  |  |  |
|                      | 5 - least | <0.001    | Ref. |      |      |        | Ref.     |      |      |        | <0.001    | Ref.              |      |      |        | Ref. |          |      |        |  |  |
| Survey method        | Online    | 0.048     | 1.13 | 0.93 | 1.36 | 0.219  | 0.86     | 0.70 | 1.05 | 0.129  | 0.019     | 1.26              | 0.98 | 1.62 | 0.070  | 1.74 | 1.10     | 2.77 | 0.019  |  |  |
| Study area           | Wales     | 0.001     | 1.02 | 0.87 | 1.19 | 0.798  | 0.76     | 0.65 | 0.89 | 0.001  | 0.728     | 0.94              | 0.77 | 1.17 | 0.595  | 0.87 | 0.56     | 1.35 | 0.530  |  |  |

AOR = adjusted odds ratio; CI = confidence interval (95%); Ref = reference category. \*Reference category for dependent variables was none. Reference categories for gender, ethnicity, survey method and study area were female, other, telephone and Bolton Local Authority respectively. <sup>#</sup>Requiring professional medical attention. Full wording of all questions is provided in Supplementary file S1.

**Table S4.** Multinomial logistic regression analysis of ACE types, socio-demographics, survey method and associations with car crash and burns

|                      |                   | Car crash           |      |        |         |        |          |        |         |        | Burn <sup>#</sup>   |      |        |         |       |          |        |         |       |
|----------------------|-------------------|---------------------|------|--------|---------|--------|----------|--------|---------|--------|---------------------|------|--------|---------|-------|----------|--------|---------|-------|
|                      |                   | Once                |      |        |         |        | 2+ times |        |         |        | Once                |      |        |         |       | 2+ times |        |         |       |
|                      |                   | Reference category* | AOR  | Low CI | High CI | P      | AOR      | Low CI | High CI | P      | Reference category* | AOR  | Low CI | High CI | P     | AOR      | Low CI | High CI | P     |
| ACE type             | Physical abuse    | 0.051               | 1.05 | 0.81   | 1.35    | 0.728  | 1.33     | 1.05   | 1.69    | 0.019  | 0.419               | 1.06 | 0.77   | 1.46    | 0.719 | 1.51     | 0.82   | 2.79    | 0.191 |
|                      | Emotional abuse   | 0.012               | 1.06 | 0.85   | 1.32    | 0.605  | 1.37     | 1.11   | 1.69    | 0.004  | 0.157               | 0.83 | 0.62   | 1.12    | 0.218 | 0.62     | 0.34   | 1.15    | 0.129 |
|                      | Sexual abuse      | 0.040               | 1.19 | 0.90   | 1.57    | 0.223  | 1.42     | 1.08   | 1.86    | 0.011  | 0.023               | 1.38 | 0.99   | 1.92    | 0.061 | 2.02     | 1.11   | 3.67    | 0.021 |
|                      | Divorce           | 0.007               | 1.36 | 1.12   | 1.66    | 0.002  | 1.22     | 0.99   | 1.49    | 0.058  | 0.318               | 1.10 | 0.85   | 1.43    | 0.487 | 0.70     | 0.41   | 1.21    | 0.203 |
|                      | Domestic violence | 0.046               | 1.21 | 0.95   | 1.54    | 0.117  | 0.87     | 0.68   | 1.11    | 0.267  | 0.063               | 1.33 | 0.98   | 1.81    | 0.070 | 1.67     | 0.92   | 3.02    | 0.093 |
|                      | Mental illness    | 0.189               | 0.85 | 0.67   | 1.07    | 0.167  | 1.07     | 0.85   | 1.34    | 0.579  | 0.016               | 1.47 | 1.11   | 1.94    | 0.007 | 1.50     | 0.86   | 2.63    | 0.157 |
|                      | Alcohol abuse     | 0.814               | 1.08 | 0.83   | 1.41    | 0.564  | 1.07     | 0.82   | 1.39    | 0.621  | 0.429               | 1.08 | 0.77   | 1.50    | 0.661 | 1.49     | 0.81   | 2.73    | 0.202 |
|                      | Drug abuse        | 0.778               | 1.12 | 0.71   | 1.78    | 0.629  | 1.17     | 0.75   | 1.83    | 0.497  | 0.346               | 0.78 | 0.45   | 1.36    | 0.386 | 1.55     | 0.69   | 3.49    | 0.287 |
|                      | Incarceration     | 0.034               | 1.17 | 0.67   | 2.03    | 0.576  | 1.89     | 1.15   | 3.12    | 0.013  | 0.008               | 1.99 | 1.15   | 3.44    | 0.014 | 2.64     | 1.18   | 5.90    | 0.018 |
| Gender               | Male              | <0.001              | 1.45 | 1.24   | 1.69    | <0.001 | 3.07     | 2.64   | 3.58    | <0.001 | 0.001               | 1.21 | 0.98   | 1.49    | 0.075 | 2.13     | 1.37   | 3.30    | 0.001 |
| Age                  | 18-29             | <0.001              | Ref. |        |         |        | Ref.     |        |         |        | 0.111               | Ref. |        |         |       | Ref.     |        |         |       |
|                      | 30-39             |                     | 1.45 | 1.06   | 2.00    | 0.022  | 2.99     | 2.05   | 4.38    | <0.001 |                     | 1.01 | 0.65   | 1.57    | 0.961 | 0.89     | 0.42   | 1.90    | 0.762 |
|                      | 40-49             |                     | 1.69 | 1.24   | 2.30    | 0.001  | 5.36     | 3.75   | 7.65    | <0.001 |                     | 1.02 | 0.67   | 1.54    | 0.928 | 0.70     | 0.33   | 1.48    | 0.347 |
|                      | 50-59             |                     | 1.45 | 1.08   | 1.94    | 0.014  | 3.85     | 2.71   | 5.45    | <0.001 |                     | 1.06 | 0.71   | 1.58    | 0.782 | 0.69     | 0.33   | 1.44    | 0.316 |
|                      | 60-69             |                     | 1.41 | 1.05   | 1.91    | 0.024  | 2.94     | 2.05   | 4.20    | <0.001 |                     | 1.09 | 0.72   | 1.65    | 0.684 | 0.47     | 0.21   | 1.08    | 0.077 |
|                      | 70+               |                     | 1.04 | 0.78   | 1.40    | 0.780  | 1.46     | 1.02   | 2.10    | 0.041  |                     | 0.72 | 0.47   | 1.10    | 0.131 | 0.35     | 0.15   | 0.84    | 0.018 |
| Ethnicity            | White             | 0.411               | 1.05 | 0.76   | 1.45    | 0.775  | 1.25     | 0.90   | 1.74    | 0.191  | 0.486               | 1.24 | 0.78   | 1.95    | 0.364 | 1.41     | 0.61   | 3.30    | 0.423 |
| Deprivation quintile | 1 - most          |                     | 0.71 | 0.57   | 0.90    | 0.004  | 0.51     | 0.40   | 0.64    | <0.001 |                     | 1.53 | 1.11   | 2.11    | 0.009 | 2.60     | 1.29   | 5.26    | 0.008 |
|                      | 2                 |                     | 0.83 | 0.65   | 1.05    | 0.113  | 0.68     | 0.54   | 0.87    | 0.002  |                     | 1.14 | 0.81   | 1.62    | 0.451 | 0.78     | 0.32   | 1.91    | 0.584 |
|                      | 3                 |                     | 0.79 | 0.62   | 1.00    | 0.050  | 0.76     | 0.60   | 0.95    | 0.019  |                     | 1.41 | 1.01   | 1.97    | 0.046 | 1.98     | 0.93   | 4.22    | 0.077 |
|                      | 4                 |                     | 1.03 | 0.82   | 1.30    | 0.777  | 0.86     | 0.68   | 1.08    | 0.197  |                     | 1.09 | 0.77   | 1.53    | 0.634 | 0.96     | 0.41   | 2.25    | 0.923 |
|                      | 5 - least         | <0.001              | Ref. |        |         |        | Ref.     |        |         |        | 0.001               | Ref. |        |         |       | Ref.     |        |         |       |
| Survey method        | Online            | 0.027               | 1.13 | 0.93   | 1.38    | 0.220  | 0.83     | 0.67   | 1.02    | 0.080  | 0.134               | 1.21 | 0.92   | 1.58    | 0.170 | 1.52     | 0.92   | 2.52    | 0.106 |
| Study area           | Wales             | 0.001               | 0.99 | 0.85   | 1.16    | 0.919  | 0.75     | 0.64   | 0.88    | <0.001 | 0.841               | 0.97 | 0.78   | 1.21    | 0.810 | 0.88     | 0.56   | 1.39    | 0.580 |

AOR = adjusted odds ratio; CI = confidence interval (95%); Ref = reference category. \*Reference category for dependant variables was none. Reference categories for gender, ethnicity, survey method and study area were female, other, telephone and Bolton Local Authority respectively. <sup>#</sup>Requiring professional medical attention. Full wording of all questions is provided in Supplementary file S1.
